# Supplementary material for: Mild SARS-CoV-2 infection results in long-lasting microbiota instability
Source: PubMed Central journal article supplement (PMC10470529; doi:10.1128/mbio.00889-23), 2023-06-09
Supplement: mbio.00889-23-s0002.pdf [file mbio.00889-23-s0002.pdf]

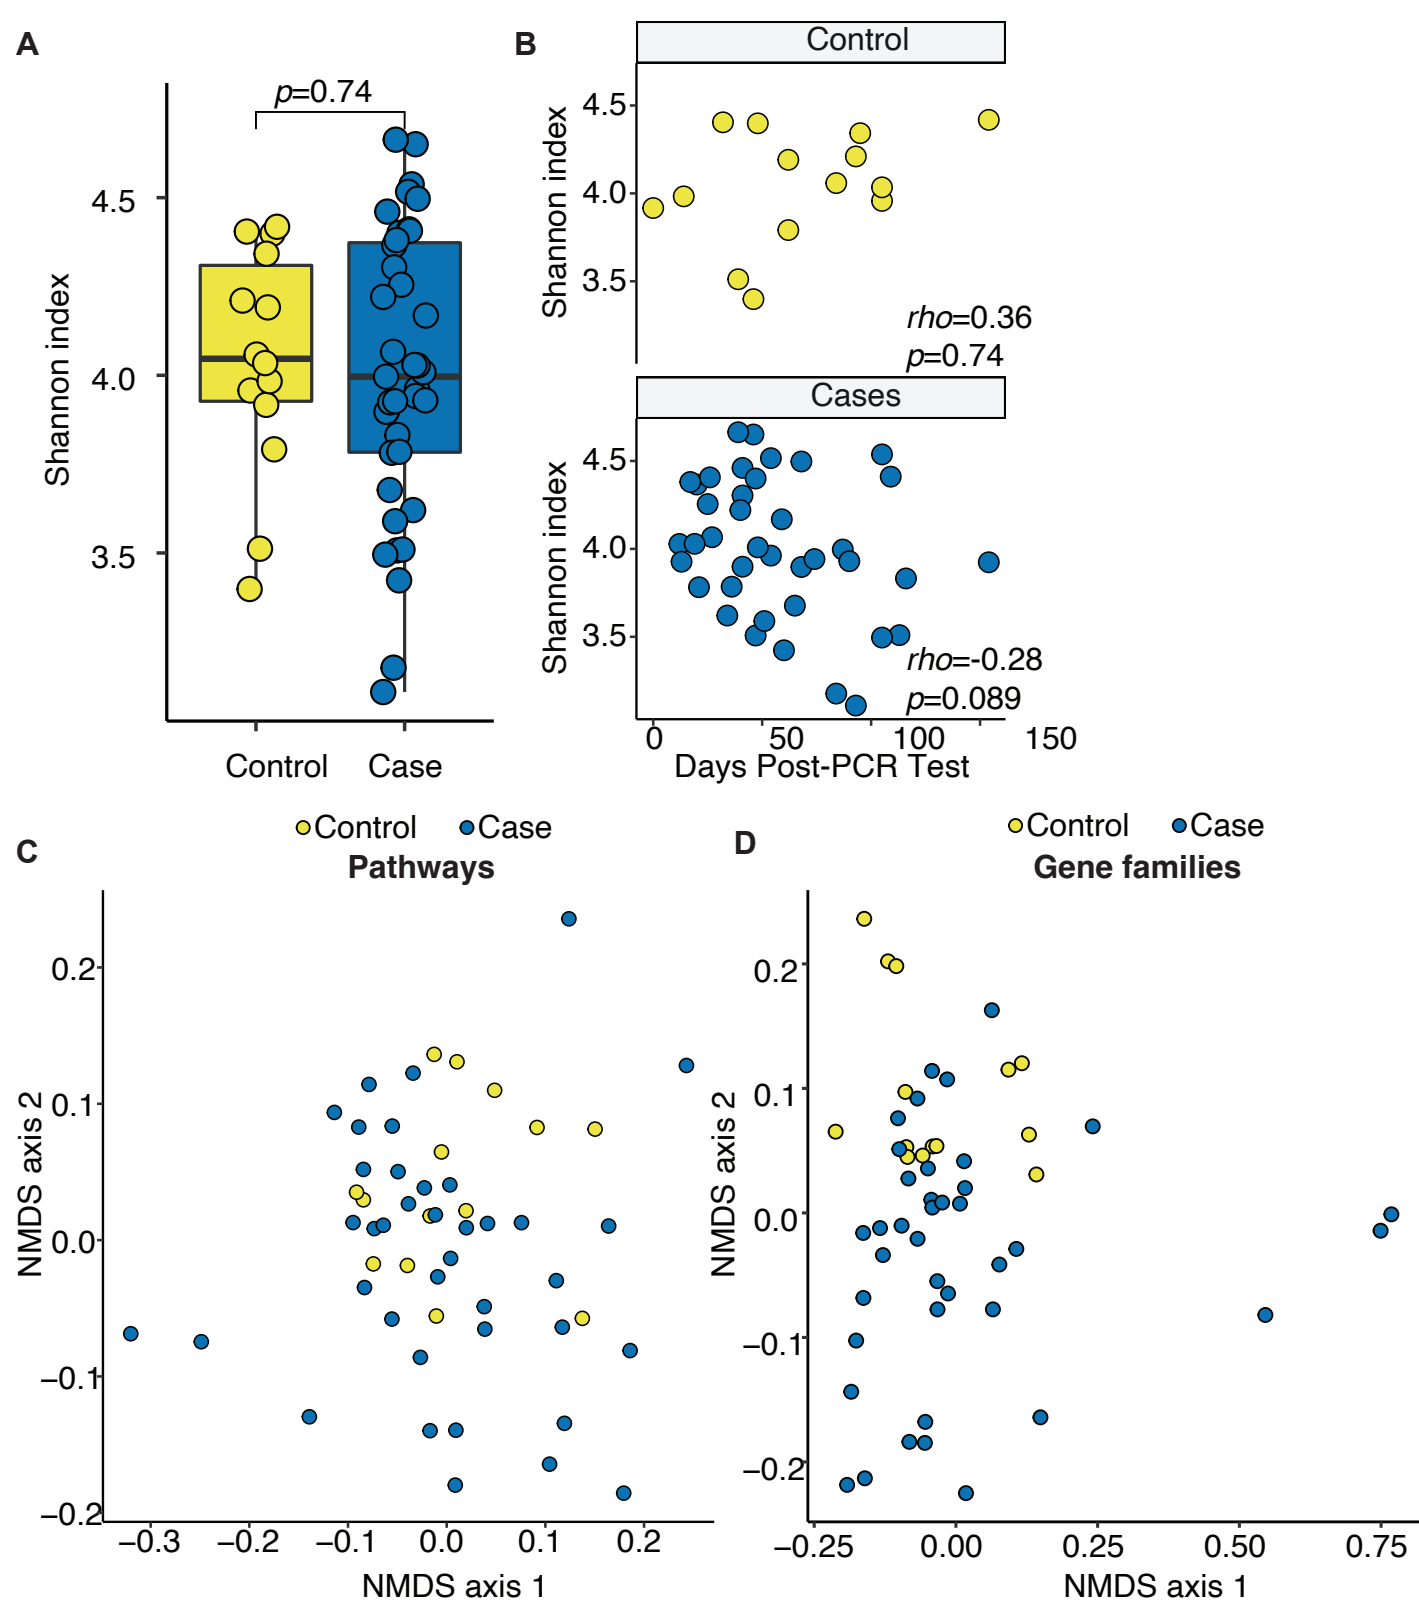

**FIG S2 Lack of a consistent signature of mild SARS-CoV-2 infection based on 16S-seq and metagenomic data. (A-B) 16S-Seq data. (C-D) MGS data. (A)** Microbial diversity was comparable between groups based on the Shannon Index ( $p$ -value, Student's  $t$  test) and **(B)** was not significantly associated with time post-PCR test (Spearman correlations shown). **(C-D)** MGS unstratified pathway data **(C)** and gene families **(D)** were not significantly different between Cases and Controls (PERMANOVA  $p_{adj}=1$ , both panels,  $n=18$  subjects, 53 samples).
