# Supplementary material for: Mild SARS-CoV-2 infection results in long-lasting microbiota instability
Source: PubMed Central journal article supplement (PMC10470529; doi:10.1128/mbio.00889-23), 2023-06-09
Supplement: mbio.00889-23-s0003.pdf [file mbio.00889-23-s0003.pdf]

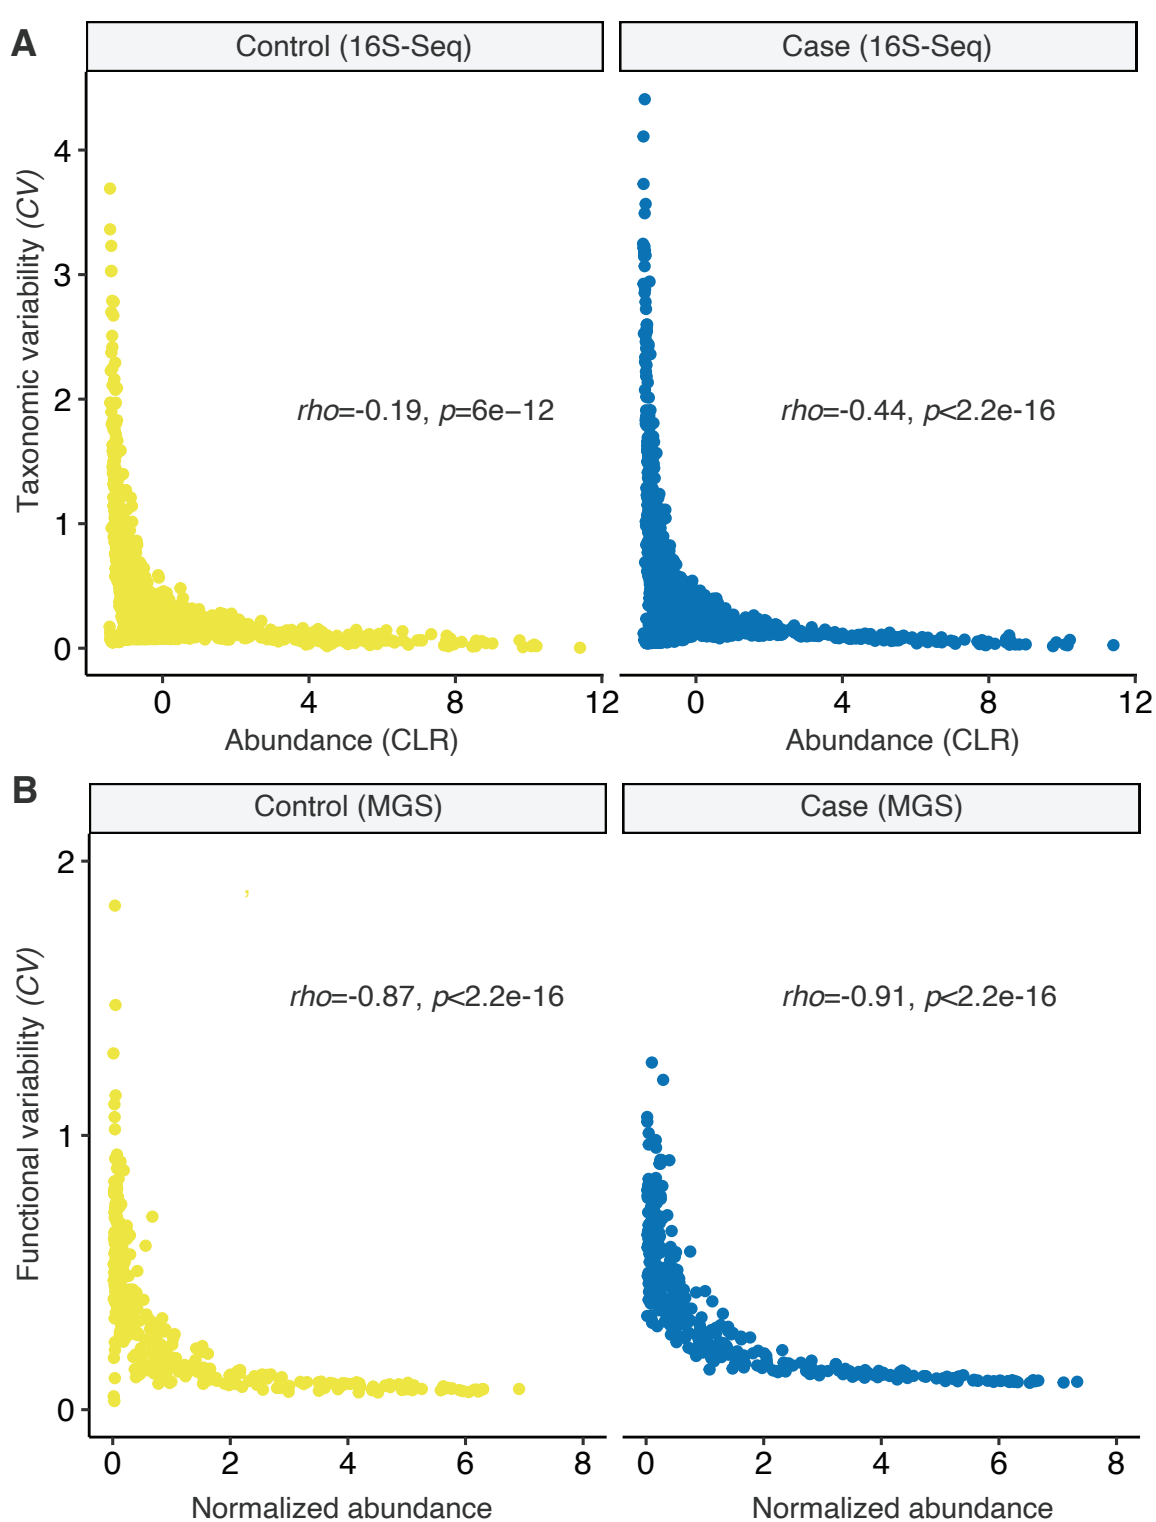

**FIG S3 Feature variability negatively correlates with abundance in Cases and Controls.** The CV of 16S-Seq ASVs (**A**) or MGS Pathways (**B**) was plotted against the abundance of each and separated between Cases and Controls. A Spearman's correlation coefficient is annotated indicating a negative correlation between CV and feature abundance in all groups.  $n=18$  subjects, 53 samples.
