# Supplementary material for: Mild SARS-CoV-2 infection results in long-lasting microbiota instability
Source: PubMed Central journal article supplement (PMC10470529; doi:10.1128/mbio.00889-23), 2023-06-09
Supplement: mbio.00889-23-s0004.pdf [file mbio.00889-23-s0004.pdf]

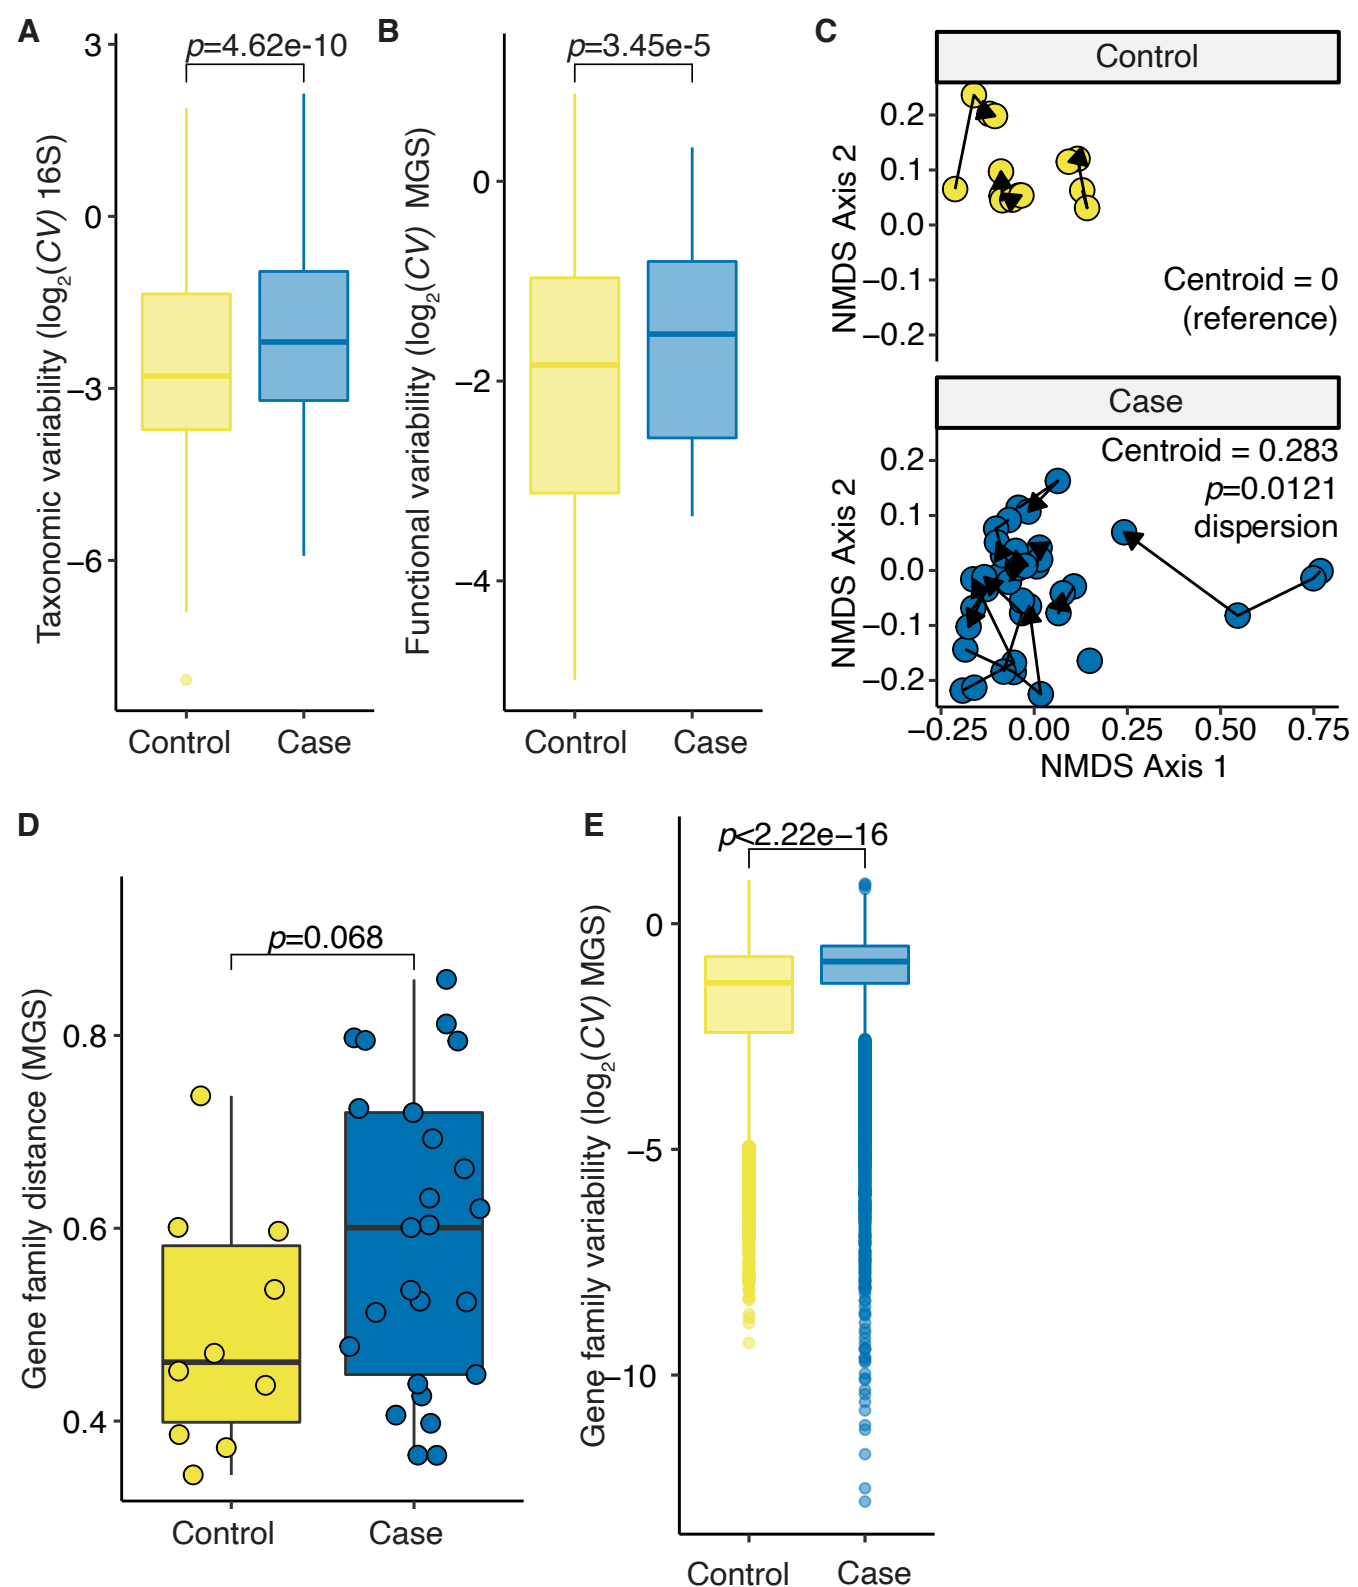

**FIG S4 The human gut microbiome is less stable following mild SARS-CoV-2 infection as measured by 16S-Seq and metagenomic data. (A-B)** CV was calculated for each feature making up **(A)** 16S-Seq and **(B)** Pathway Data. A Dunn's post test of Kruskal-Wallis ANOVA is annotated. **(C)** Principal coordinate analysis of MGS data annotated to gene families. A given subject is connected by a line with arrows indicating successive sample collection;  $p$ -value for  $\beta$ -dispersion from the vegan package for SARS-CoV-2 positivity is displayed and is calculated between Cases and Controls and adjusted using Tukey's multiple comparisons. **(D)** Subsequent distances between successive points as shown in **Fig. S4A**. Student's  $t$ -test between groups is annotated. **(E)** CV was calculated for each feature making up gene family MGS data. A Dunn's post test of Kruskal-Wallis ANOVA is annotated.  $n=18$  subjects, 53 samples.
