# Supplementary material for: Mild SARS-CoV-2 infection results in long-lasting microbiota instability
Source: PubMed Central journal article supplement (PMC10470529; doi:10.1128/mbio.00889-23), 2023-06-09
Supplement: mbio.00889-23-s0006.pdf [file mbio.00889-23-s0006.pdf]

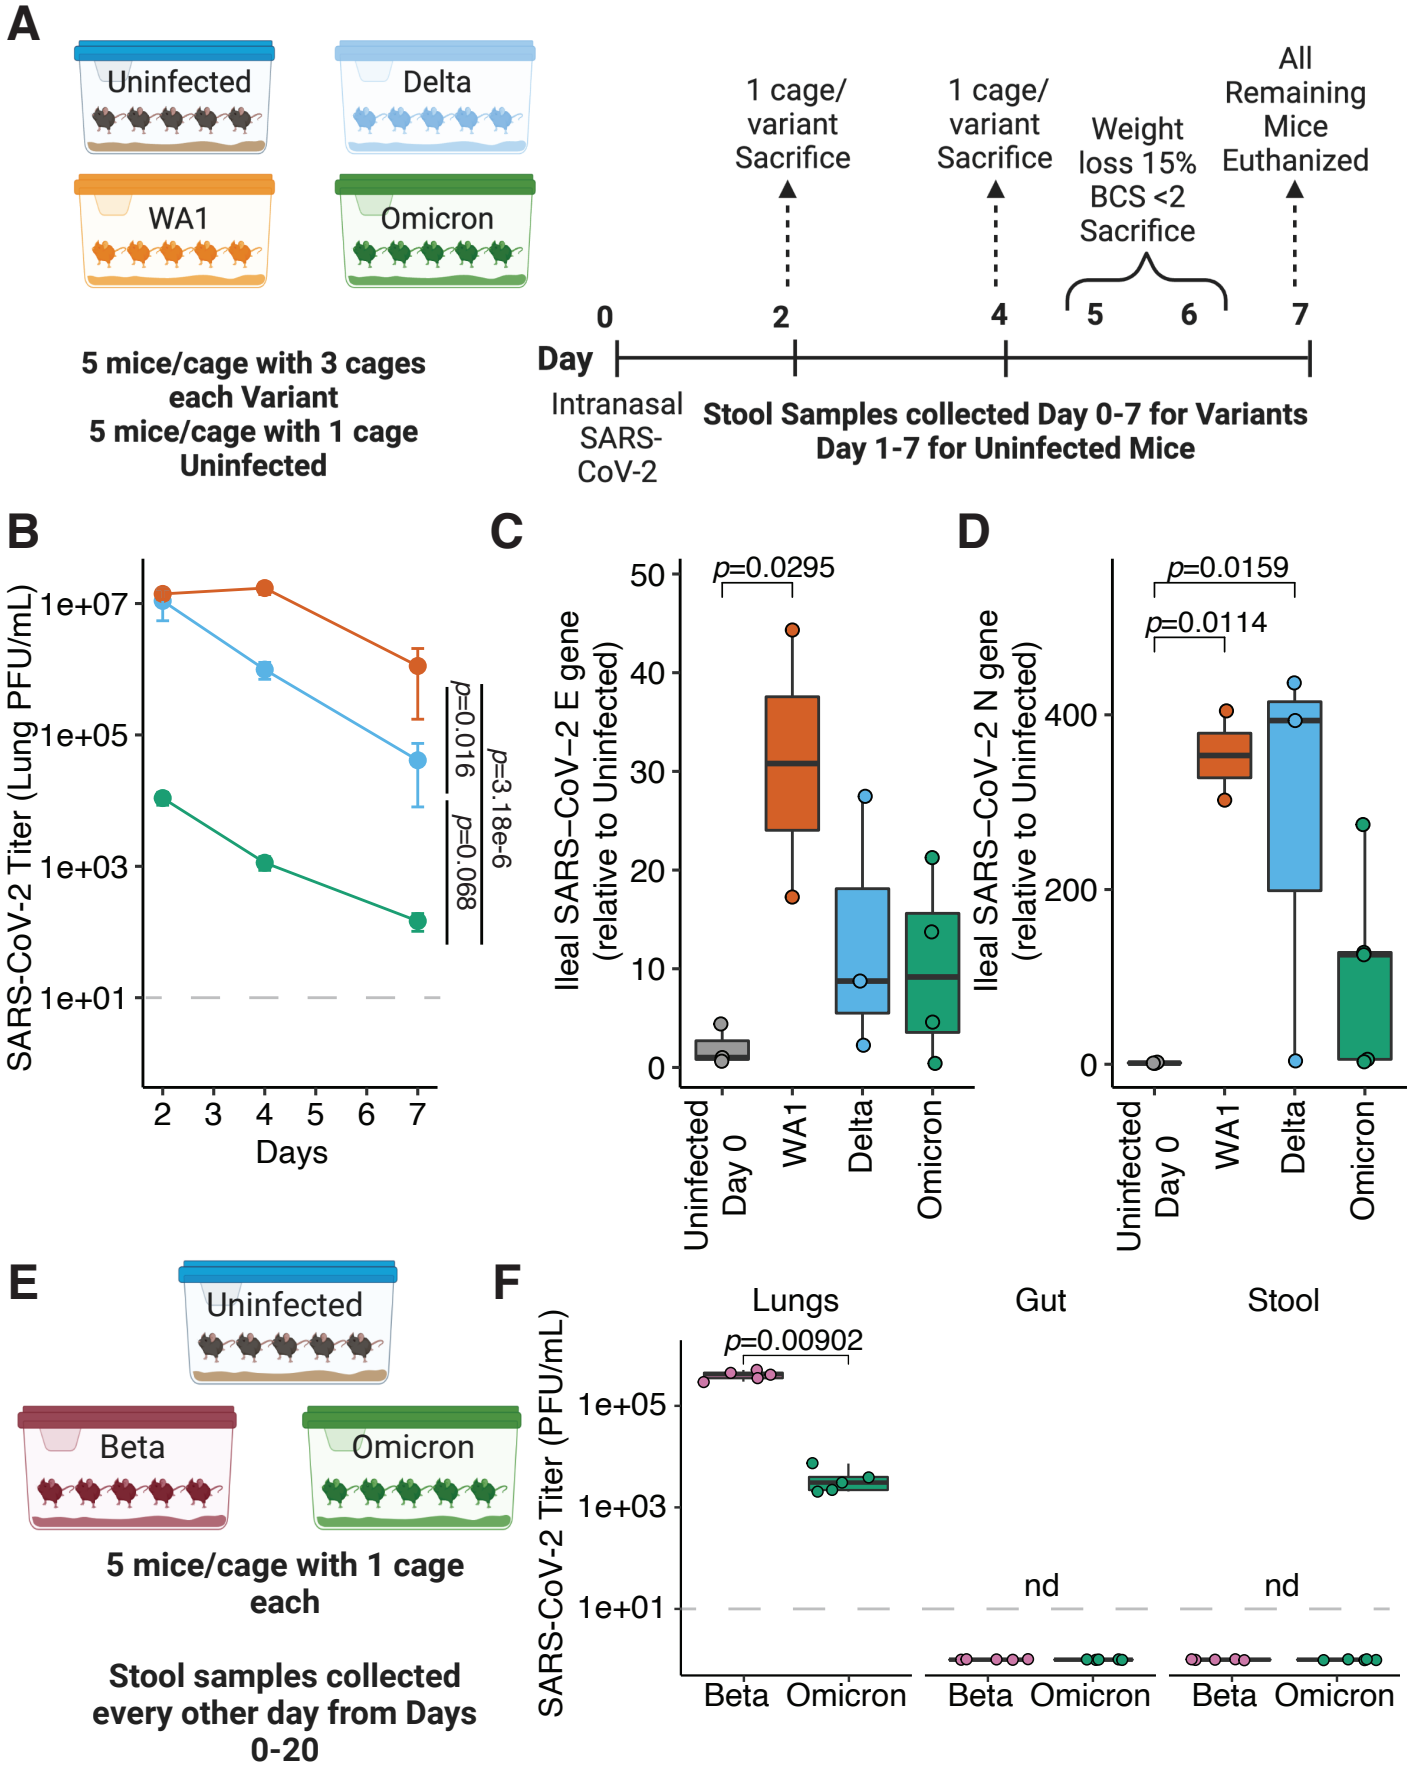

**FIG S6 The ABSL3 SARS-CoV-2 infection model and associated viral titers.** (A) 50 female mice were housed at a ratio of 5 mice/cage in an ABSL3 facility. Three cages of mice were infected with each variant ( $n=45$  mice,  $n=15$  per variant) and one cage of mice was uninfected ( $n=5$  mice). One cage of mice was sacrificed for each variant at days 2, 4, and 7 for lung viral titer assessment. Any mice reaching a sacrificial endpoint (weight loss of 15% or body conditioning scale (BCS) < 2) were euthanized and removed from the experiment on days 5 and 6. All remaining mice were sacrificed on day 7. (B) Lung viral titers for each variant are shown as described in (23) with mean $\pm$ sem plotted at each timepoint. Statistics represent 2 way-ANOVA and where titer is a function of variant and time, and the  $p$ -value for variant between the indicated comparisons is displayed. The limit of detection (LOD) for viral plaques is indicated by a gray, dashed line (LOD=10 plaque forming units (PFU) per mL). SARS-CoV-2 envelope (E) gene qPCR (C) or nucleocapsid (N) gene qPCR (D) was conducted on tissue from animals harvested at day 7 post infection. The unadjusted Dunn's post-test of Kruskal Wallis analysis of variance is displayed for the groups with  $p<0.05$  and all non-displayed comparisons are not significant. Uninfected mice were sacrificed and included as controls; given they were never infected with SARS-CoV-2 a day of infection of 0 was assigned in the figure. For (A)  $n=10$  unique cages with 55 total samples from 50 mice. In (B)  $n=12$  mice for WA1,  $n=13$  mice for Delta, and  $n=15$  mice for Omicron infected mice. In (C-D) each data point reflects one mouse ( $n=2-4$  mice per group and timepoint). (E) Experimental design for C57BL/6J background infected mice. (F) PFUs from indicated body sites ( $n=5$  mice per group) and statistics reflect Mann-Whitney U test between groups for lung samples. Live virus was not detected (nd) from Gut and Stool. LOD=10 PFU per mL and is indicated by a gray, dashed line.
